# Supplementary material for: Protection against H5N1 Highly Pathogenic Avian and Pandemic (H1N1) 2009 Influenza Virus Infection in Cynomolgus Monkeys by an Inactivated H5N1 Whole Particle Vaccine
Source: PubMed Central journal article supplement (PMC3871535; doi:10.1371/journal.pone.0082740), 2013-12-23
Supplement: pone.0082740.s004.pdf [file pone.0082740.s004.pdf]

**Table S1. Cynomolgus macaques used in the present study**

| Challenge virus strain                 | Abbreviation | Without vaccination | With vaccination |
|----------------------------------------|--------------|---------------------|------------------|
| A/Vietnam/UT3040/2004 (H5N1)           | VN3040       | VN1, VN2, VN3       | VN4, VN5, VN6    |
| A/whooper swan/Hokkaido/1/2008 (H5N1)  | HOK1         | Ho1, Ho2, Ho3       | Ho4, Ho5, Ho6    |
| A/chicken/Netherlands/2586/2003 (H7N7) | NL2586       | NL1, NL2, NL3       | NL4, NL5, NL6    |
| A/Narita/1/2009 (H1N1)                 | NRT1         | NR1, NR2, NR3       | NR4, NR5, NR6    |
