# Supplementary material for: Protection against H5N1 Highly Pathogenic Avian and Pandemic (H1N1) 2009 Influenza Virus Infection in Cynomolgus Monkeys by an Inactivated H5N1 Whole Particle Vaccine
Source: PubMed Central journal article supplement (PMC3871535; doi:10.1371/journal.pone.0082740), 2013-12-23
Supplement: pone.0082740.s005.pdf [file pone.0082740.s005.pdf]

**Table S2. Virus titers in tissues obtained at autopsy**

| Virus                 | VN3040 |      |      | HOK1 |      |      |
|-----------------------|--------|------|------|------|------|------|
| Animal                | VN1    | VN2  | VN3  | Ho1  | Ho2  | Ho3  |
| Tissue/Autopsy day    | 7      | 7    | 7    | 7    | 7    | 5    |
| Oro/nasopharynx       | <      | <    | <    | 4.00 | 2.50 | 4.50 |
| Tonsil R              | 4.33   | 1.67 | 2.33 | 2.67 | 3.67 | 3.50 |
| Tonsil L              | 4.33   | <    | 3.67 | 1.67 | 1.67 | 2.67 |
| Trachea               | 4.00   | 1.67 | <    | 2.50 | 3.67 | 5.33 |
| Bronchus R            | 1.67   | <    | <    | 3.50 | 3.67 | 4.50 |
| Bronchus L            | 3.67   | <    | <    | 3.33 | 3.37 | 4.23 |
| Lung RU               | 3.67   | <    | <    | 3.33 | 3.50 | 5.67 |
| Lung RM               | 3.33   | <    | 1.67 | 4.00 | 4.50 | 5.00 |
| Lung RL               | 4.67   | <    | <    | 2.67 | 5.00 | 5.50 |
| Lung LU               | 4.23   | <    | <    | 1.67 | 4.67 | 5.33 |
| Lung LM               | 1.67   | <    | <    | 2.00 | 4.50 | 5.50 |
| Lung LL               | 1.67   | <    | <    | 4.33 | 4.67 | 4.50 |
| Mediastinal LN        | 1.67   | <    | <    | <    | <    | 2.67 |
| Cerebrum frontal lobe | <      | <    | <    | <    | <    | 2.67 |
| Muscle                | <      | <    | <    | <    | <    | 4.50 |
| Jejunum               | <      | 1.67 | <    | <    | <    | <    |

<: Virus titers under the detection limit (< 1.67 TCID<sub>50</sub>/g tissue). R: right, L: left, RU: right upper lobe, RM: right middle lobe, RL: right lower lobe, LU: left upper lobe, LM: left middle lobe, LL: left lower lobe, LN: lymph nodes.
