# Supplementary material for: Protection against H5N1 Highly Pathogenic Avian and Pandemic (H1N1) 2009 Influenza Virus Infection in Cynomolgus Monkeys by an Inactivated H5N1 Whole Particle Vaccine
Source: PubMed Central journal article supplement (PMC3871535; doi:10.1371/journal.pone.0082740), 2013-12-23
Supplement: pone.0082740.s006.pdf [file pone.0082740.s006.pdf]

**Table S3. Similarity of amino acid sequences in HA and NA between Vac-3 and challenge strains.**

| Strain | Subtype | HA             |           | NA             |           |
|--------|---------|----------------|-----------|----------------|-----------|
|        |         | Similarity (%) | GI number | Similarity (%) | GI number |
| Vac-3  | H5N1    | -              | 156522879 | -              | 156522883 |
| VN3040 | H5N1    | 93             | 295189630 | 90             | 295189542 |
| HOK1   | H5N1    | 91             | 188035684 | 89             | 188035688 |
| NL2586 | H7N7    | 43             | 189178851 | 43             | 189178855 |
| NRT1   | H1N1    | 66             | 237659680 | 90             | 237681746 |
