# Supplementary material for: Protection against H5N1 Highly Pathogenic Avian and Pandemic (H1N1) 2009 Influenza Virus Infection in Cynomolgus Monkeys by an Inactivated H5N1 Whole Particle Vaccine
Source: PubMed Central journal article supplement (PMC3871535; doi:10.1371/journal.pone.0082740), 2013-12-23
Supplement: pone.0082740.s007.pdf [file pone.0082740.s007.pdf]

**Table S4. Clinical scoring used in this study**

| <b>Parameter</b> | <b>Degree of parameter</b>                                                                                           | <b>Possible score</b> |
|------------------|----------------------------------------------------------------------------------------------------------------------|-----------------------|
| Fever            | Normal (< 39 °C)                                                                                                     | 0                     |
|                  | Elevated temperature (39-40 °C)                                                                                      | 3                     |
|                  | High temperature (> 40 °C)                                                                                           | 5                     |
| Posture          | Piloerection of body hair                                                                                            | 1                     |
|                  | Decreased activity, decreasing normal behavior/Occasionally lying down, huddled, active when people in room          | 2                     |
|                  | Huddled on camera, active when people in room/Lying down, getting up when approached, using cage for support         | 3                     |
|                  | Huddled when people in room, shaking, toes and hands clenched/Lying down, not getting up when approached or prompted | 5                     |
| Respiration      | Increased or decreased; mild cough and clear nasal discharge                                                         | 3                     |
|                  | Labored breathing through mouth; severe cough and severe nasal discharge                                             | 5                     |
| Appetite         | Slightly decreased                                                                                                   | 1                     |
|                  | Decreased                                                                                                            | 2                     |
|                  | Severely decreased                                                                                                   | 5                     |
| Skin             | Flushed appearance                                                                                                   | 2                     |
|                  | Visible rash                                                                                                         | 2                     |
|                  | Bleeding                                                                                                             | 5                     |
